# Supplementary material for: Quantum plasmonic two-dimensional WS2–MoS2 heterojunction
Source: Royal Society of Chemistry journal article supplement (doi:10.1039/d3nr00861d), 2023-01-01
Supplement: d3nr00861d1.pdf [file d3nr00861d1.pdf]

## Supplementary Materials

### **Quantum plasmonic two-dimensional heterojunction of WS<sub>2</sub>-MoS<sub>2</sub>**

Sharad Ambardar<sup>1</sup>, Zachary H. Withers<sup>2</sup>, Jiru Liu<sup>3</sup>, Xiaoyi Lai<sup>4</sup>, Abdullah Albagami<sup>5,6</sup>, Alina Zhukova<sup>6</sup>, Pedro Fabris Capelli<sup>6</sup>, Prasana K. Sahoo<sup>7</sup> and Dmitri V. Voronine<sup>1,6</sup>

<sup>1</sup>*Department of Medical Engineering, University of South Florida, Tampa, FL 33620, USA*

<sup>2</sup>*Department of Physics, Stony Brook University, Stony Brook, NY 11790, USA*

<sup>3</sup>*Department of Physics, Texas A&M University, College Station, TX 77840, USA*

<sup>4</sup>*CAS Center for Excellence and Synergetic Innovation Center in Quantum Information and Quantum Physics, University of Science and Technology of China, Hefei, Anhui 230026, China*

<sup>5</sup>*Department of Physics, King Saud University, Riyadh 11362, KSA*

<sup>6</sup>*Department of Physics, University of South Florida, Tampa, FL 33620, USA*

<sup>7</sup>*Materials Science Centre, India Institute of Technology, Kharagpur, India*

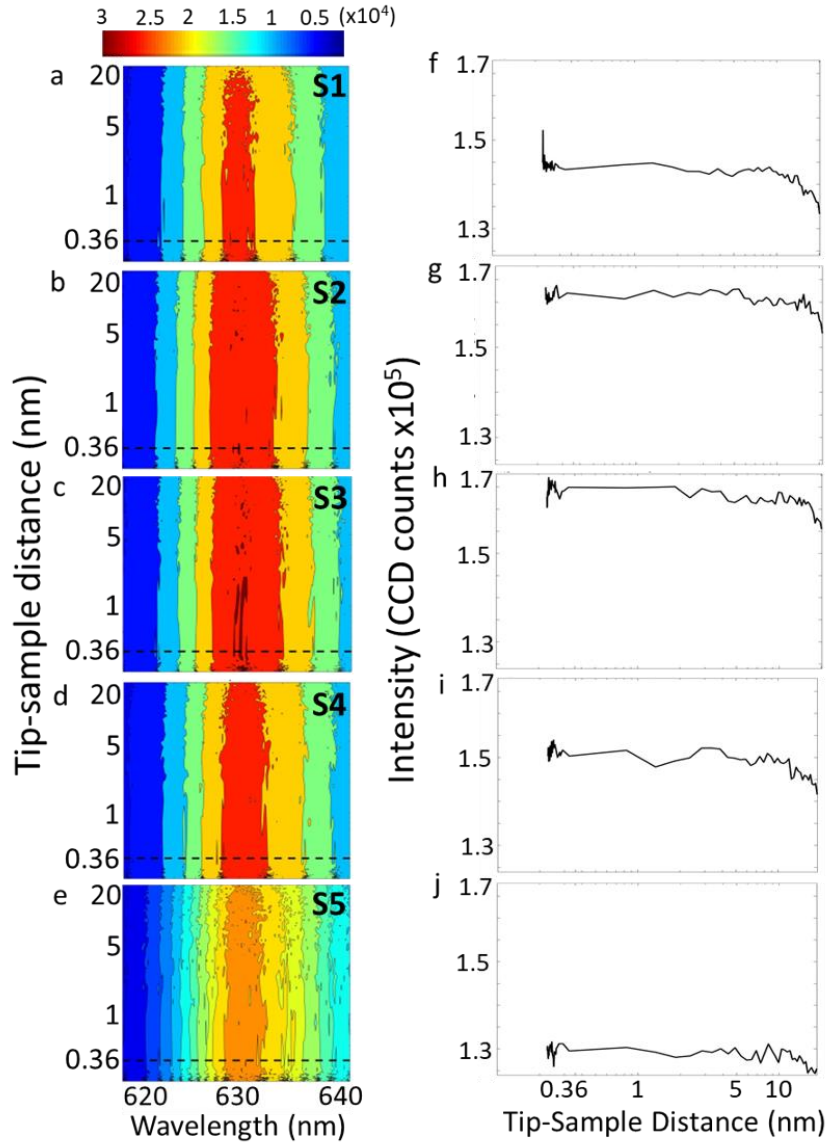

Figure S1. Tip-sample distance dependence TEPL measurements. Fig 2a-2e shows 2D contour plots showing tip-sample distance measurements with  $0.2\text{nm} \leq d \leq 20\text{nm}$  as a function of wavelength on 5 spots. 2a-2b are the spots on the  $\text{WS}_2$  side of heterostructure, very close to junction. As the tip goes from 20 nm to 0.36 nm, no significant change in intensities is observed in spot 1 and spot 2 as observed by 2a, 2b and their corresponding enhancement factors 2f and 2g. At spot 3, a significant enhancement in PL is observed (2c and 2h) as the tip goes at 1nm distance from the sample due to the hot electron enhancement mechanism in  $\text{MoS}_2$ . Spot 4 and spot 5 show slight enhancement as we go from heterojunction towards  $\text{MoS}_2$  as seen in 2d-2e. The TEPL intensity spectra at all 5 spots are also shown from k-o in 2d-2e. The TEPL intensity spectra at all 5 spots are also shown from k-o.

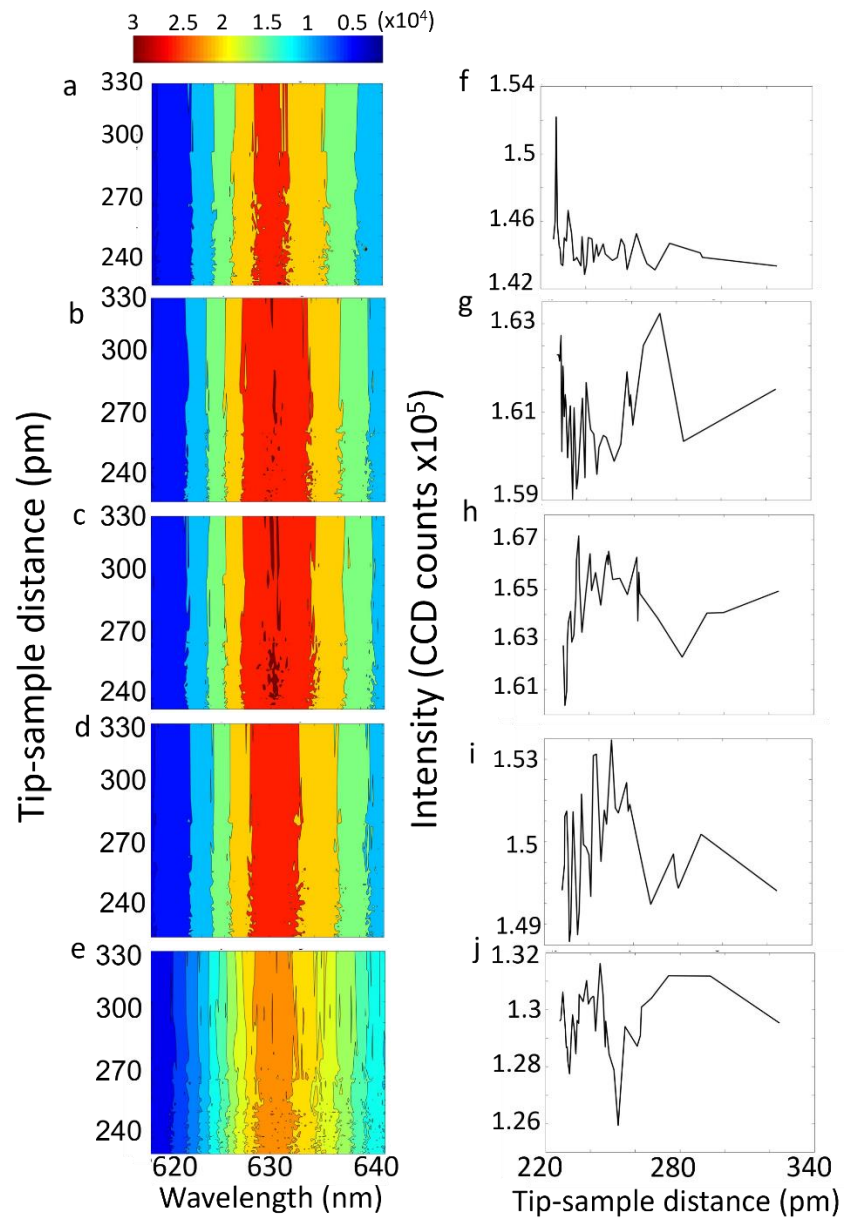

Figure S2. Tip-sample distanced measurements in the quantum regime. At the heterojunction the tip-sample distance measurements are done with  $d < 320$  pm, referred as quantum plasmonic regime on spots 1 thru 5.
